# Supplementary material for: PatentInspector: An Open-Source Tool for Applied Patent Analysis and Information Extraction
Source: MDPI journal article supplement (doi:10.3390/app132413147), 2023-12-11
Supplement: s1 [file s1]

Archive with 1 entries (1 files):
- applsci-2718692-supplementary.pdf
